# Supplementary material for: Factors determining the patients’ care intensity for surgeons and surgical nurses: a conjoint analysis
Source: PubMed Central journal article supplement (PMC4575441; doi:10.1186/s12913-015-1052-4), 2015-09-18

**Appendix 1** Example of a scenario and care intensity question as presented in the questionnaire

**Scenario 1**

You have admitted a patient electively with clear signs of a cholecystitis. The patient and his admission feature the following attributes:

**Patient:** 70 years old, slightly overweight (BMI 27), with a normal oral intake suffering from heart failure and COPD, uses beclomethasone, salmeterol, fluticasone, simvastatin, verapamil and furosemide. The anesthesiologist classifies the patient preoperatively as ASA 3.

**Surgical procedure and postoperative course:** You perform a laparoscopic cholecystectomy. Postoperatively, the patient's abdomen remains tender. Furthermore, his respiration becomes increasingly insufficient, for which he is transferred to the ICU, where the intensive care physician takes over. Because of bile leakage, detected through CT-scanning and an MRCP, a bile drain is placed transcutaneously. Eventually, the patient is transferred to the surgical ward for further recovery.

**Discharge:** The patient is discharged to his home, where he receives home care for the drain.

**How would you rate the care intensity of this patient during hospitalization? Give the answer that best fits your opinion (1 = very light; 10 = very heavy):**

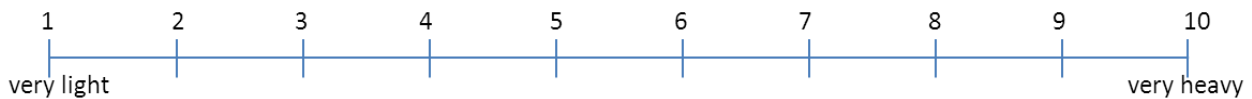

Supplement: 12913_2015_1052_MOESM1_ESM.pdf [file 12913_2015_1052_MOESM1_ESM.pdf]
